# Supplementary material for: 8-Cl-Ado and 8-NH2-Ado synergize with venetoclax to target the methionine-MAT2A-SAM axis in acute myeloid leukemia
Source: PubMed Central journal article supplement (PMC11147765; doi:10.1038/s41375-024-02222-w), 2024-04-20
Supplement: 41375_2024_2222_MOESM1_ESM.pdf [file 41375_2024_2222_MOESM1_ESM.pdf]

Supplementary Table 1. Primers used for qRT-PCR.

|             |         |                          |
|-------------|---------|--------------------------|
| METTL16     | F 5'→3' | CTCTGACGTGTA CTCTCCTAAGG |
|             | R 5'→3' | TACCAGCCATTCAAGGTTGCT    |
| METTL3      | F 5'→3' | TTGTCTCCA ACCTTCCGTAGT   |
|             | R 5'→3' | CCAGATCAGAGAGGTGGTGTAG   |
| METTL14     | F 5'→3' | AGTGCCGACAGCATTGGTG      |
|             | R 5'→3' | GGAGCAGAGGTATCATAGGAAGC  |
| MAT2A hp1   | F 5'→3' | CATGGGAAGTGCCCAAAAAG     |
|             | R 5'→3' | CAGAGCTTGAAGGCTTCTCT     |
| MAT2A hp2-6 | F 5'→3' | ATTCTGGGGTATGGCGTAAG     |
|             | R 5'→3' | TAAAAGCTGCCATCTGAGGT     |
| MAT2A A     | F 5'→3' | CCACCCAGATAAGATTTGTGACC  |
|             | R 5'→3' | GATGTAATTTCCCCAGCAAGAAG  |
| MAT2A B     | F 5'→3' | TCAGAAGAGTGAGAGAGAGCTAT  |
|             | R 5'→3' | CCATAGGCTGCAGTCCTC       |
| MAT2A C     | F 5'→3' | TTTCTGCCCTTAGGATGACC     |
|             | R 5'→3' | CAAGATCCTGGGTTTGTCT      |
| MAT2A D     | F 5'→3' | AAGTGGGTTGCTCAAGGTTT     |
|             | R 5'→3' | CCTGGCTCAACAATACGAA      |
| WTAP        | F 5'→3' | CTTCCCAAGAAGGTTTCGATTGA  |
|             | R 5'→3' | TCAGACTCTCTTAGGCCAGTTAC  |
| FTO         | F 5'→3' | ACTTGGCTCCCTTATCTGACC    |
|             | R 5'→3' | TGTGCAGTGTGAGAAAGGCTT    |
| ALKBH5      | F 5'→3' | CGGCGAAGGCTACACTTACG     |
|             | R 5'→3' | CCACCAGCTTTTGGATCACCA    |
| GADPH       | F 5'→3' | GGAGCGAGATCCCTCCAAAAT    |
|             | R 5'→3' | GGCTGTTGTCATACTTCTCATGG  |

A

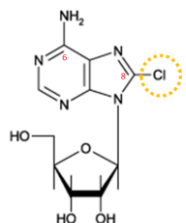

8-Chloro-Adenosine (8CA)

B

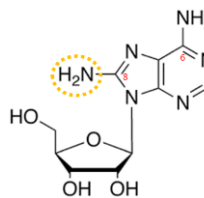

8-Amino-Adenosine (8AA)

C

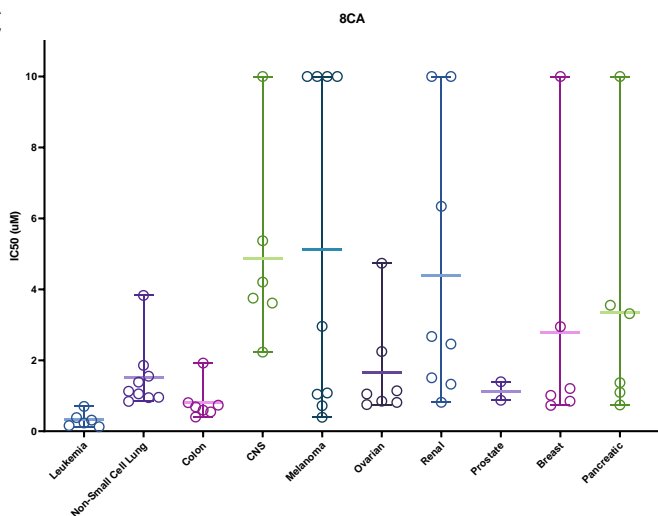

D

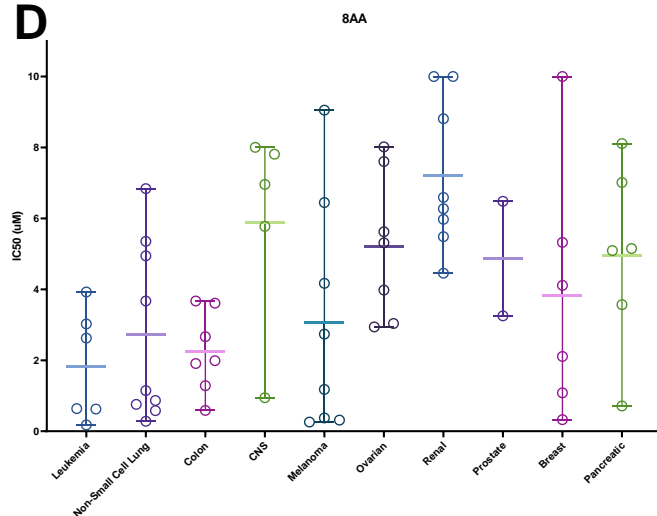

E

| AML Cell Line | OCI-AML3 |       | MOLM13 |       | MV4-11 |       | KG-1a |       |
|---------------|----------|-------|--------|-------|--------|-------|-------|-------|
|               | 8CA      | 8AA   | 8CA    | 8AA   | 8CA    | 8AA   | 8CA   | 8AA   |
| 48h IC50 (nM) | 362.3    | 292.7 | 309.8  | 176.9 | 392.1  | 194.4 | 384.7 | 323.2 |

F

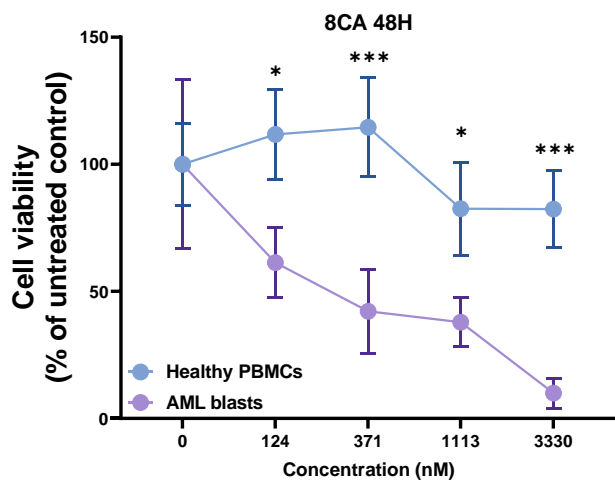

G

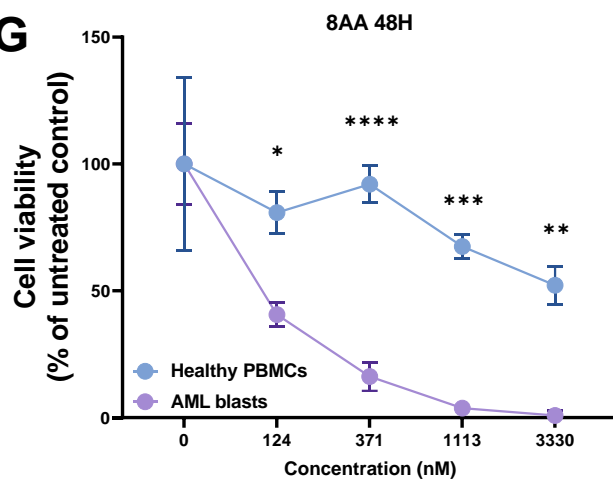

**Supplementary Figure 1. 8CA/8AA exhibit favorable antileukemic activities. A-B** Structures of 8-chloro-adenosine (8CA) and 8-amino-adenosine (8AA). **C-D** IC50s of 8CA/8AA in different cancer cell lines (NCI-60 Screen). **E** Four AML cell lines were treated with 8CA/8AA in a series of concentrations for 48 h and the cell viabilities were measured. IC50s were determined by “Absolute IC50, X represents log(concentration)” equation, measured by GraphPad Prism software (n=4). **F-G** PBMCs isolated from healthy donor and primary blasts isolated from the bone marrow of AML patients were treated with 8CA/8AA in a series of concentrations and the cell viability was measured (n=3). <sup>ns</sup>p > 0.05, \*p≤0.05, \*\*p≤0.01, \*\*\*p≤0.001, \*\*\*\*p≤0.0001.

**A** MV4-11 8CA

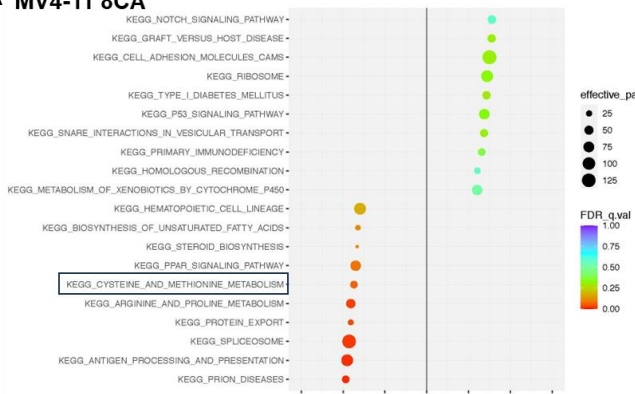

**B** MV4-11 8AA

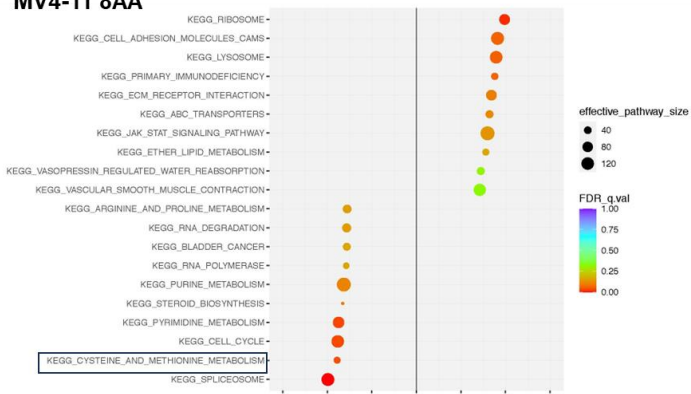

**C** KG-1a 8CA

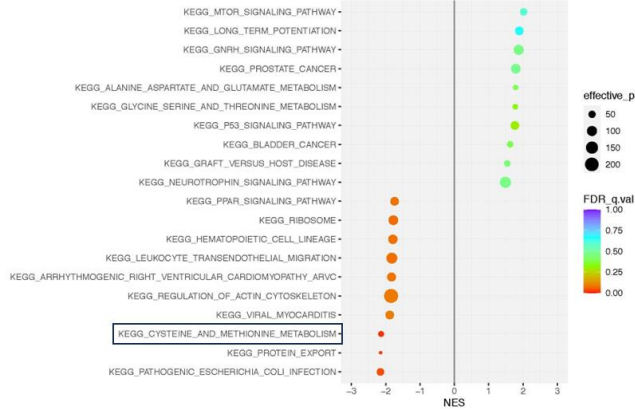

**D** KG-1a 8AA

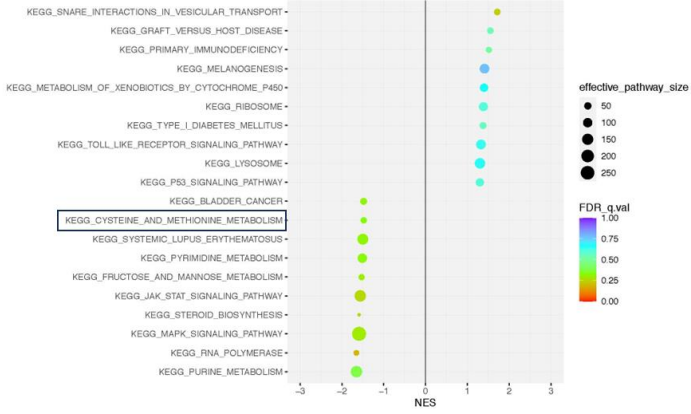

**E**

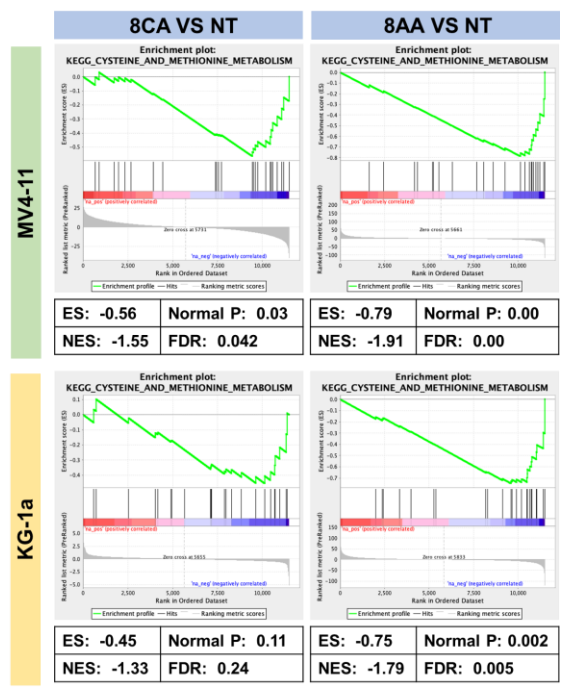

**F**

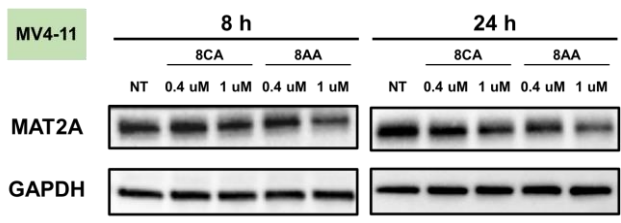

**G**

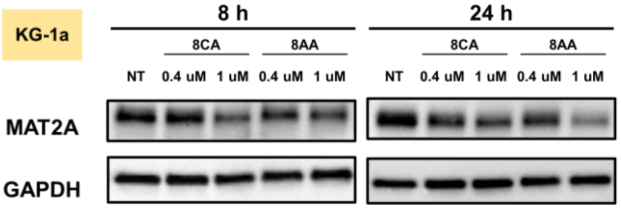

**H**

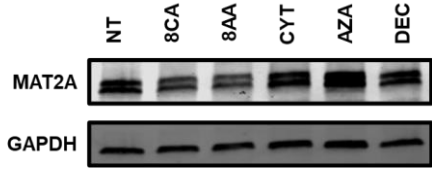

**Supplementary Figure 2. 8CA/8AA downregulate the cysteine and methionine metabolism pathway.**

**A-E** AML cell lines MV4-11 and KG-1a were treated with 1  $\mu$ M 8CA/8AA for 8 h, and the differentially expressed genes compared to nontreated group were analyzed by RNA sequencing and enriched using KEGG database and GSEA software (n=2). **F-G** Protein levels of MAT2A in MV4-11 and KG-1a were measured after 8 h and 24 h treatment with vehicle (NT), 0.4  $\mu$ M or 1  $\mu$ M 8CA/8AA. **H** Protein levels of MAT2A in MV4-11 cells were measured after 48 h treatment with vehicle (NT), 1  $\mu$ M 8CA, 8AA, cytarabine (CYT), azacitidine (AZA) or decitabine (DEC).

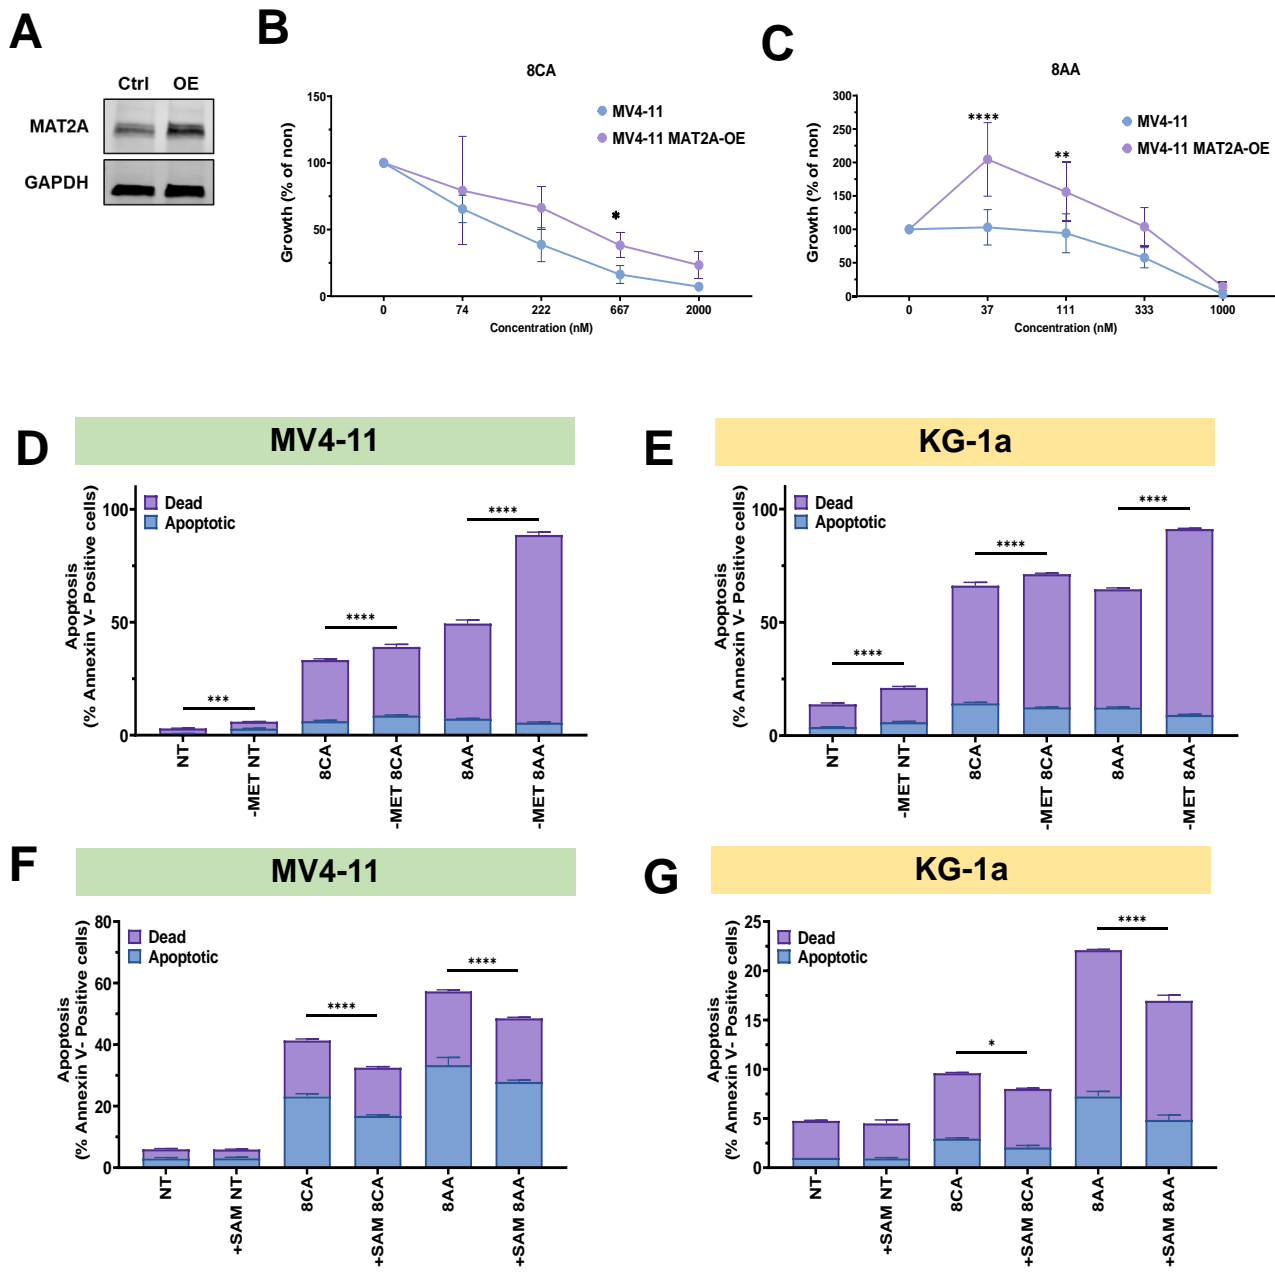

**Supplementary Figure 3. 8CA/8AA function on AML through inhibiting MAT2A. A-C** Protein levels of MAT2A in control-treated MV4-11 cells (Ctrl) and MV4-11 cells overexpressing (OE) MAT2A were measured to confirm transduction efficiency. Cell viability of the two cell lines after 24 h treatment with 8CA/8AA in a series of concentrations was measured. **D-E** Cell apoptosis of MV4-11 and KG-1a was measured through flow cytometry after 24 h treatment with vehicle (NT) or 1  $\mu$ M 8CA/8AA in complete media or methionine-depleted media (n=3). **F-G** Cell apoptosis of MV4-11 and KG-1a was measured after 24 h pre-treatment with complete media or media containing 500  $\mu$ M SAM and followed by 24 h treatment with vehicle (NT) or 1  $\mu$ M 8CA/8AA (n=2). <sup>ns</sup>p > 0.05, \*p $\leq$ 0.05, \*\*p $\leq$ 0.01, \*\*\*p $\leq$ 0.001, \*\*\*\*p $\leq$ 0.0001.

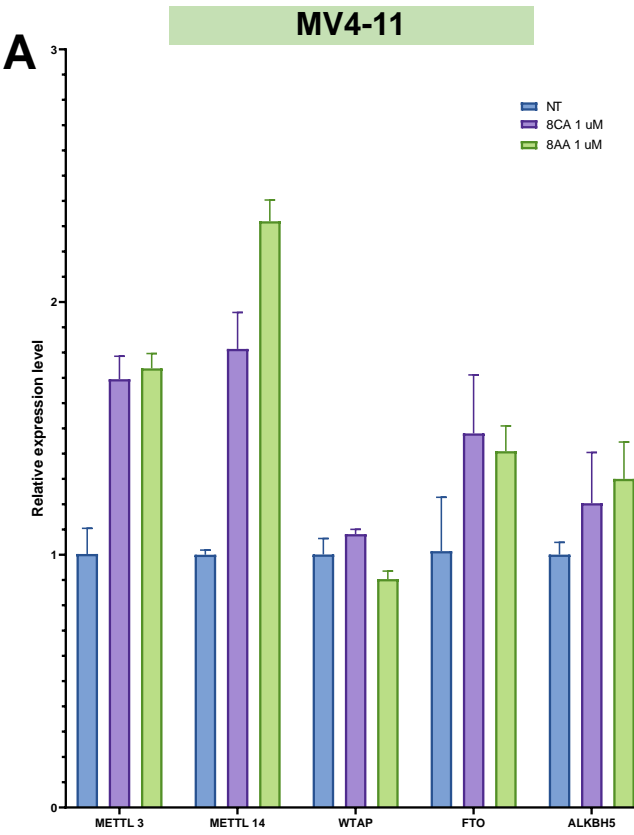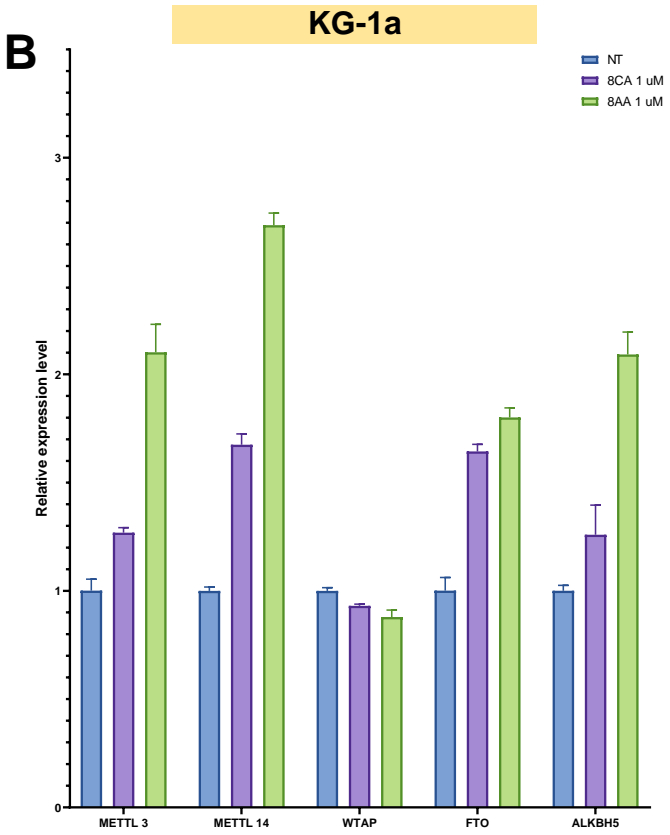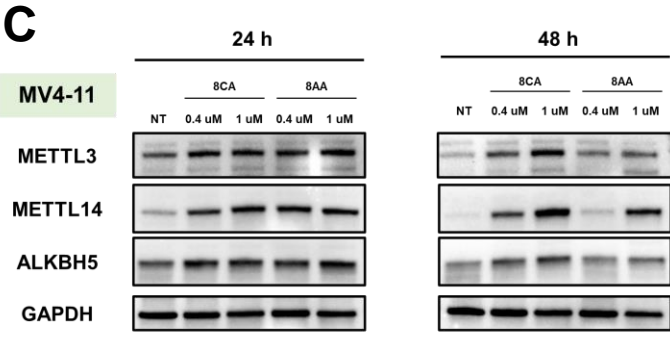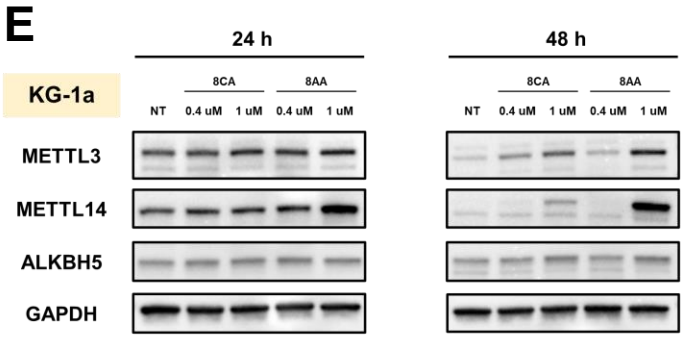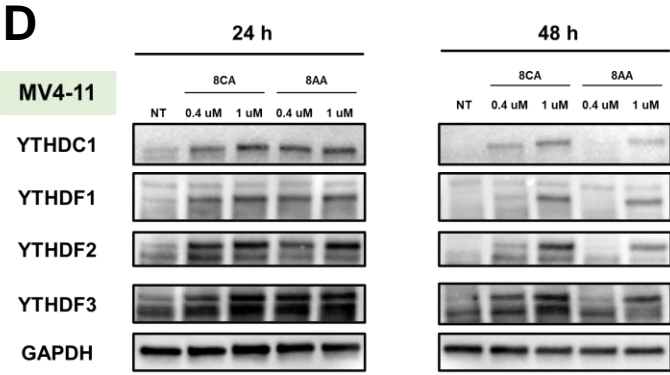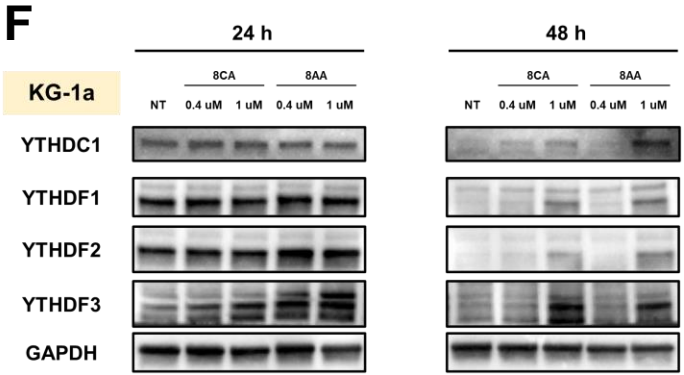



**Supplementary Figure 4. 8CA/8AA upregulate the expression levels of RNA methylation related enzymes.** **A-B** RNA levels of genes of interest in MV4-11 and KG-1a were measured after 24 h treatment with vehicle (NT) or 1  $\mu$ M 8CA/8AA (n=3). The RNA levels are normalized to GAPDH expression. **C-F** Protein levels of genes of interest in MV4-11 and KG-1a were measured after 24 h or 48 h treatment with vehicle (NT), 0.4  $\mu$ M or 1  $\mu$ M 8CA/8AA.

A

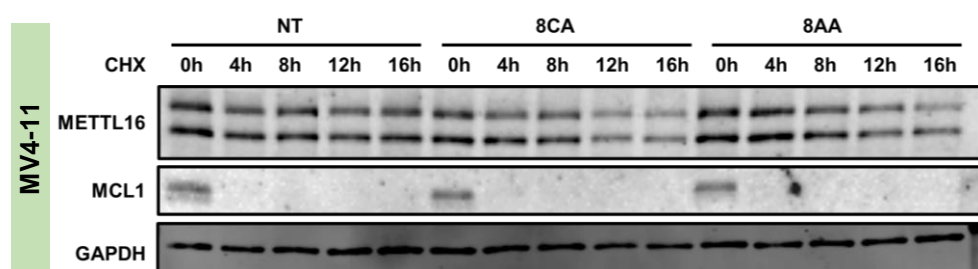

B

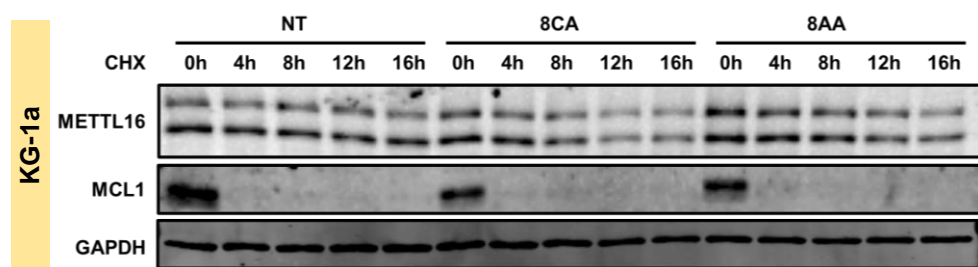

C

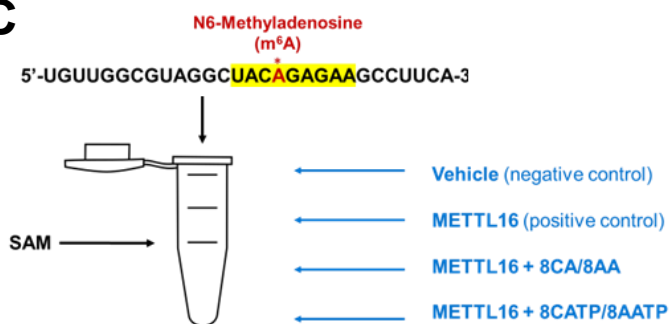

D

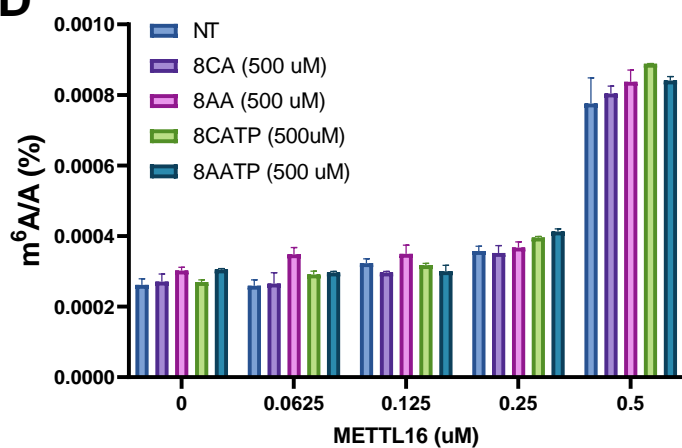

E

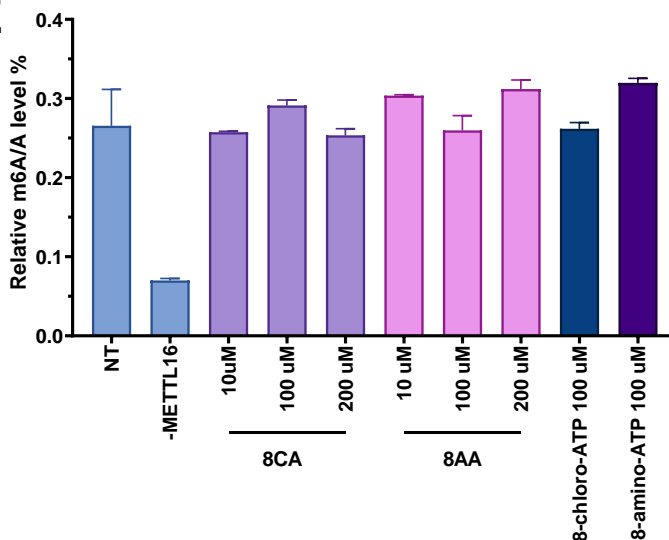

F

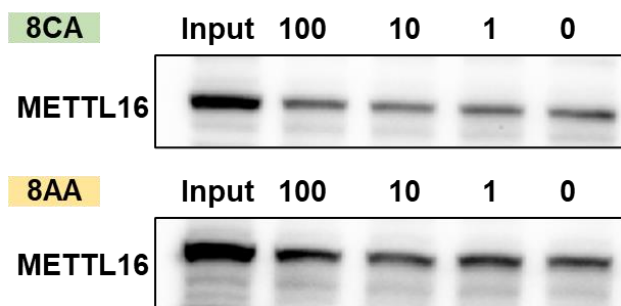

**Supplementary Figure 5. 8CA/8AA do not affect the degradation or enzymatic activity of METTL16 protein.** **A-B** MV4-11 and KG-1a cells were pretreated with 1  $\mu$ M 8CA/8AA for 12 h and the protein levels of METTL16 were measured at multiple time points through Western blot after the protein synthesis was stopped by adding 100  $\mu$ g/mL cycloheximide (CHX). **C-E** RNA oligos containing the sequence that can be methylated by METTL16 were incubated with SAM, and then incubated with vehicle (NT), METTL16 protein, or METTL16 plus 8CA/8AA or their cellular metabolites 8CATP/8AATP at increasing concentrations. The methylation level represented by m6A/A ratio was measured through QQQ-mass spectrometry. **F** ITDRF detection of interaction between 8CA/8AA and METTL16 protein.

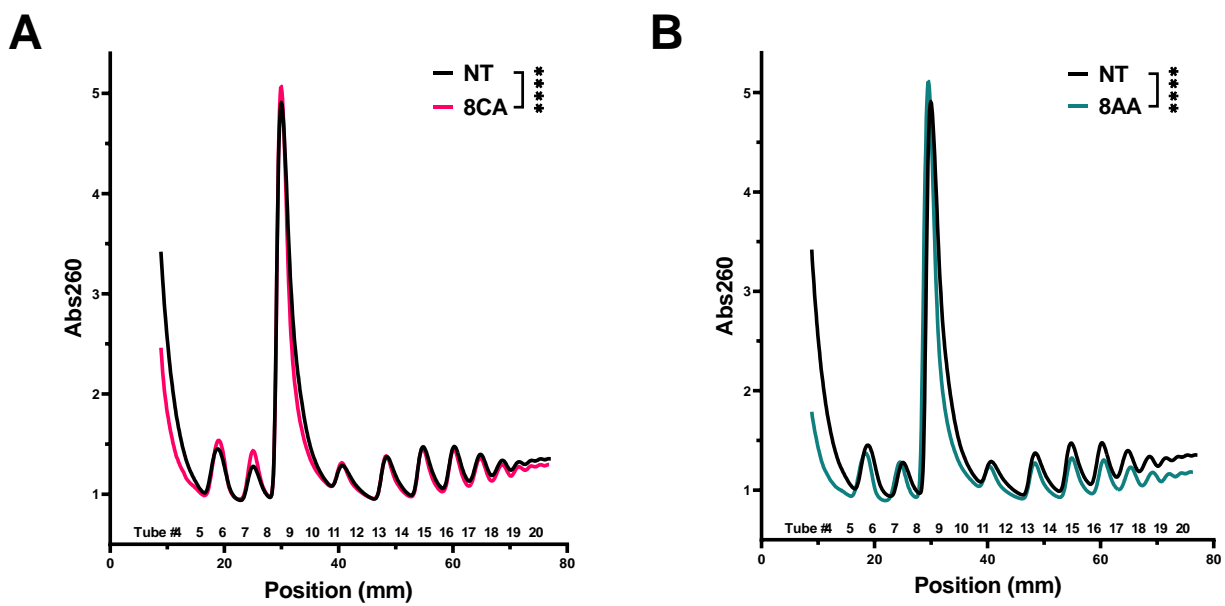

**Supplementary Figure 6. Polysome profiles.** A-B Polysome profiles of MV4-11 after 24 h treatment with vehicle (NT) or 1  $\mu$ M 8CA/8AA were determined by sucrose density gradient ultracentrifugation (n=3).

\*\*\*\*p $\leq$ 0.0001.

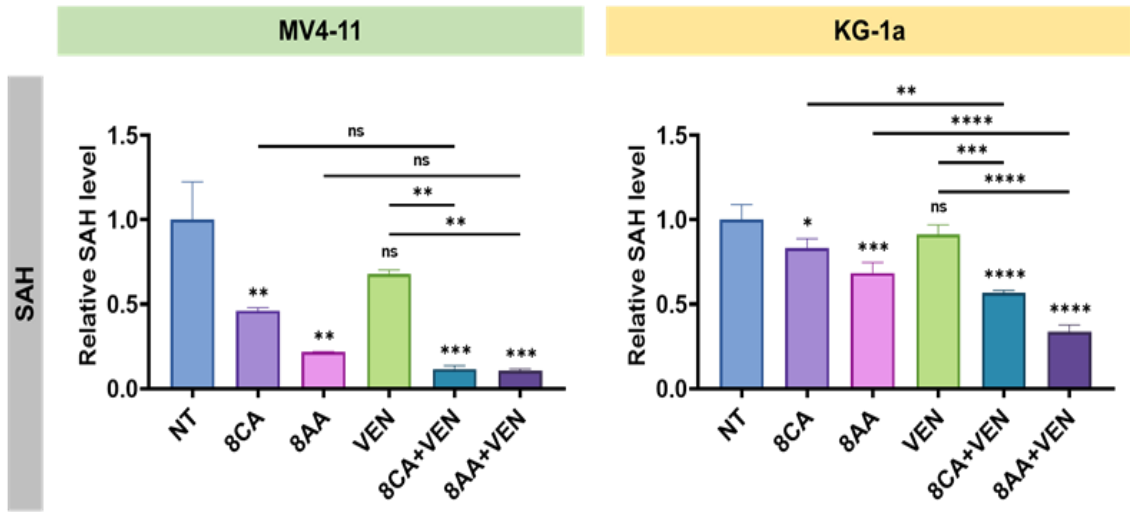

**Supplementary Figure 7. 8CA/8AA do not increase SAH levels in AML cell lines.** MV4-11 and KG-1a cells were treated with vehicle (NT), 1  $\mu\text{M}$  8CA/8AA, 0.02  $\mu\text{M}$  VEN or their combinations for 48 h, then the intracellular SAH levels were measured through mass spectrometry (n=3).  $^{ns}p > 0.05$ ,  $^{*}p \leq 0.05$ ,  $^{**}p \leq 0.01$ ,  $^{***}p \leq 0.001$ ,  $^{****}p \leq 0.0001$ .

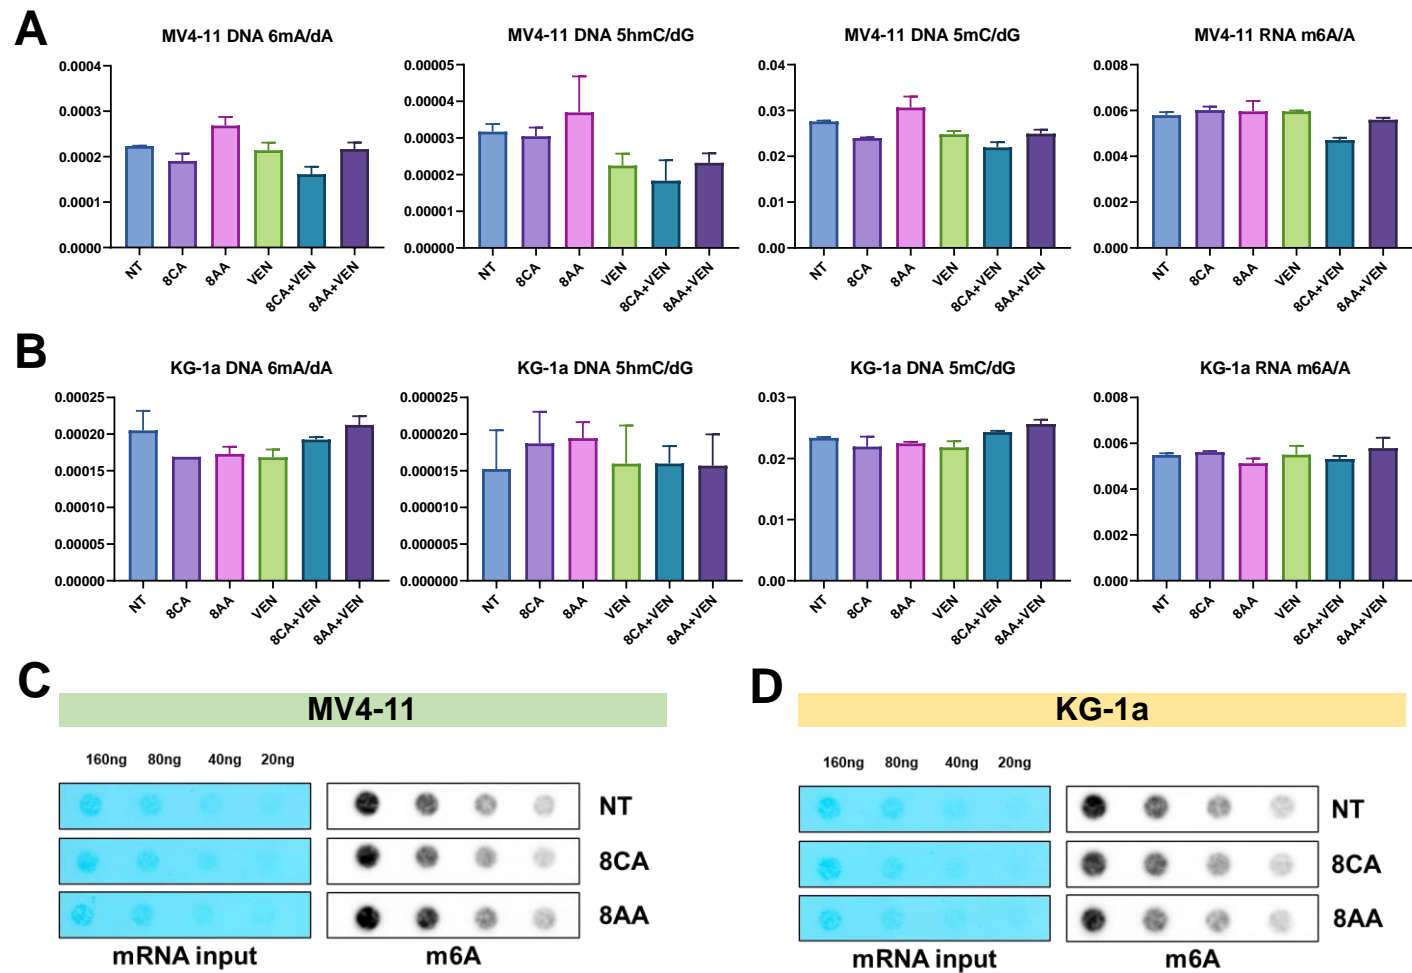

**Supplementary Figure 8. 8CA/8AA do not affect DNA or RNA methylations.** **A-B** Methylation levels of total DNA and total RNA in MV4-11 and KG-1a were measured through mass spectrometry after 48 h treatment with vehicle (NT), 1  $\mu$ M 8CA/8AA, 0.02  $\mu$ M VEN or their combinations. **C-D** Methylation levels of mRNA in MV4-11 and KG-1a were measured through dot blot assay after 48 h treatment with vehicle (NT) or 1  $\mu$ M 8CA/8AA.

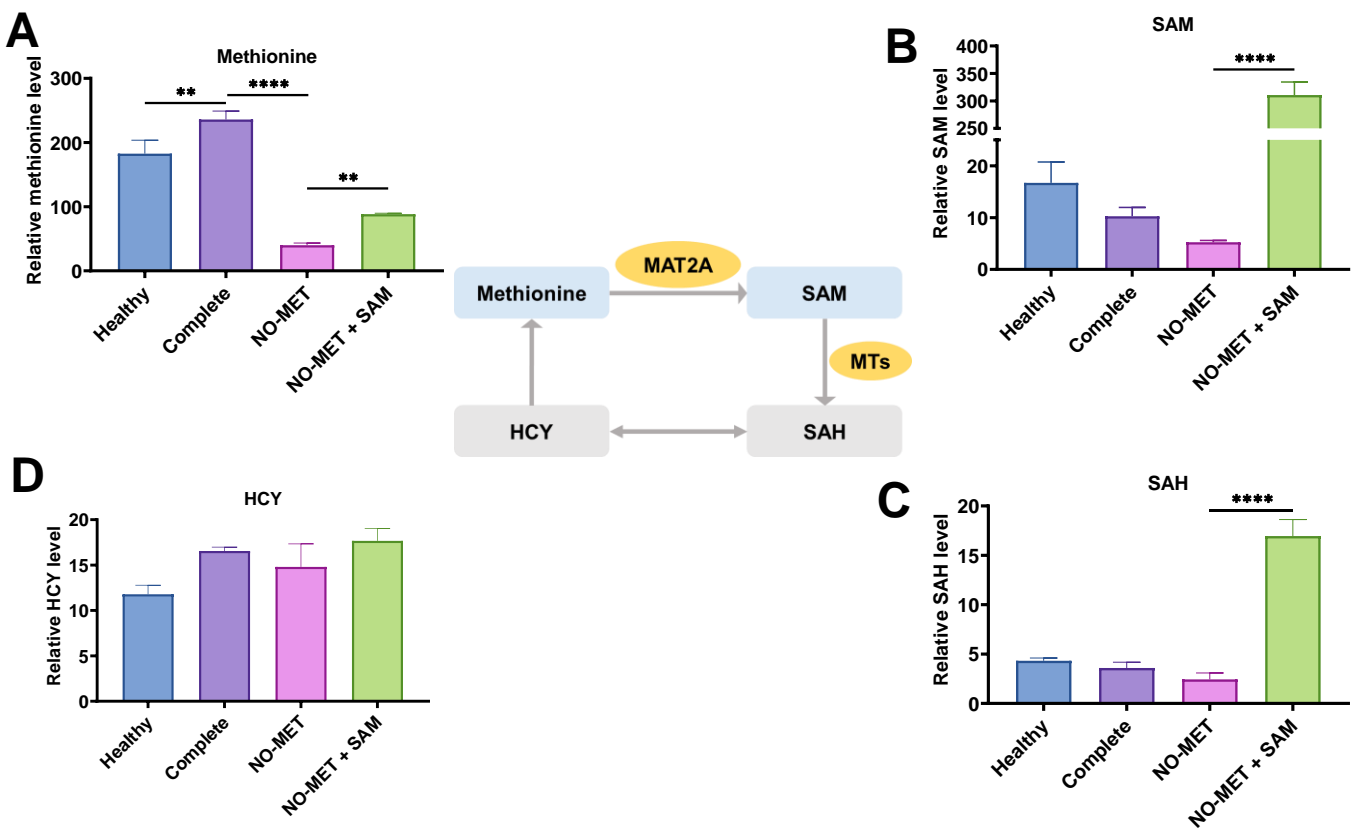

**Supplementary Figure 9. Cellular uptake of Methionine and SAM.** A-D Healthy PBMCs (Healthy) were treated with complete media. Primary R/R AML blasts were treated with complete media (Complete), methionine-depleted media (NO-MET), or methionine-depleted media supplemented with 500  $\mu$ M SAM (NO-MET + SAM) for 24h, and the intracellular methionine, SAM, SAH and HCY levels of were measured through mass spectrometry (n=3).  $^{ns}p > 0.05$ ,  $^{*}p \leq 0.05$ ,  $^{**}p \leq 0.01$ ,  $^{***}p \leq 0.001$ ,  $^{****}p \leq 0.0001$ .

**A**

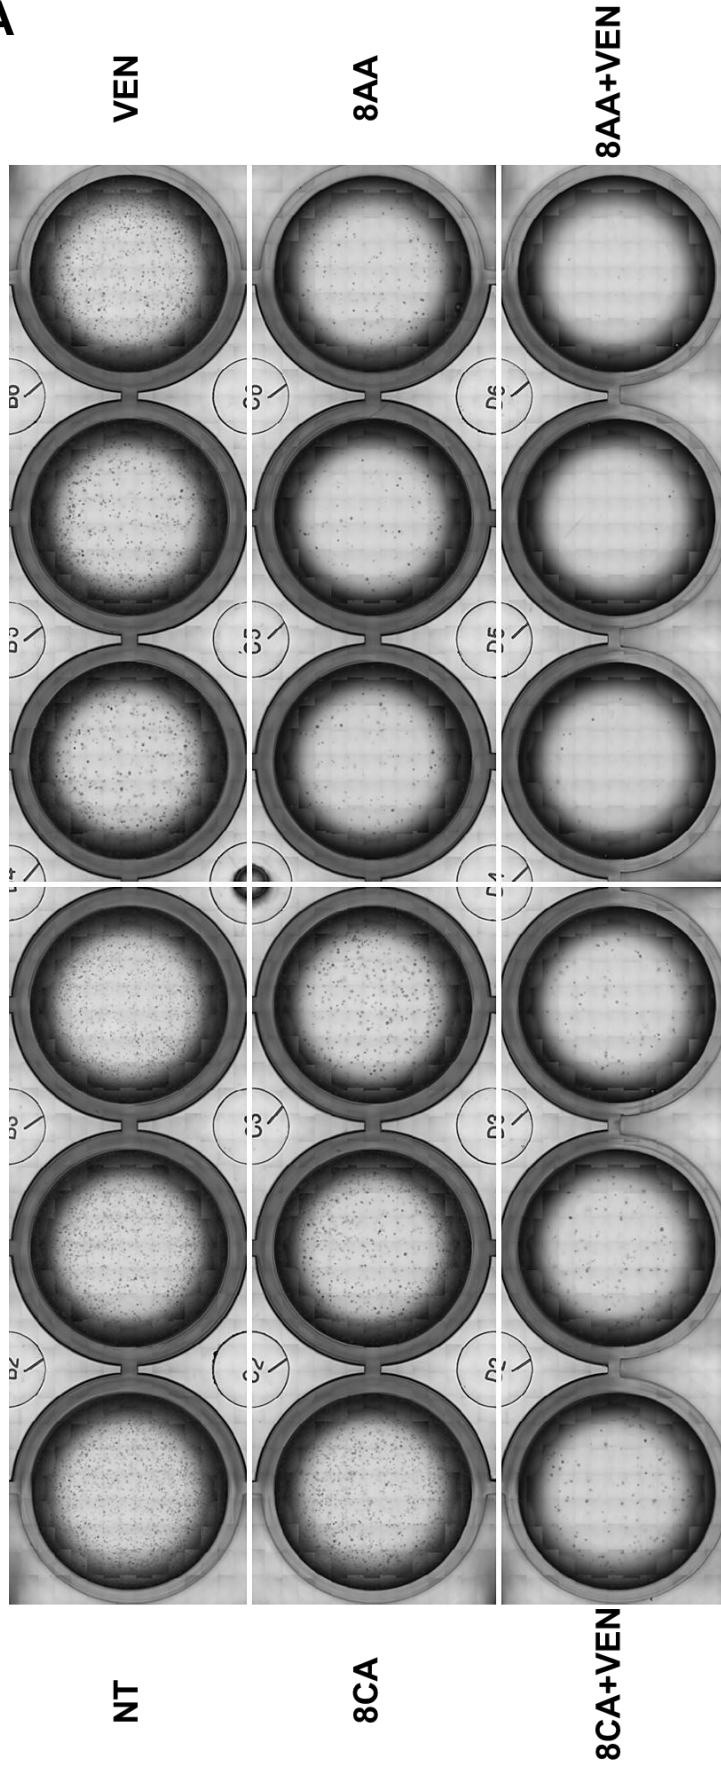

**B**

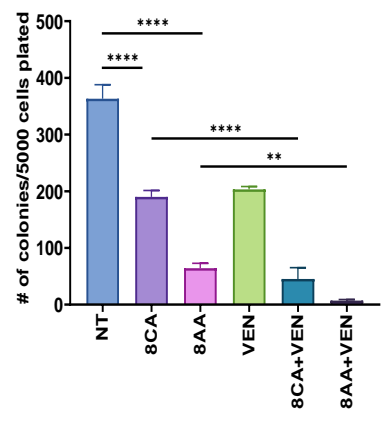

**C**

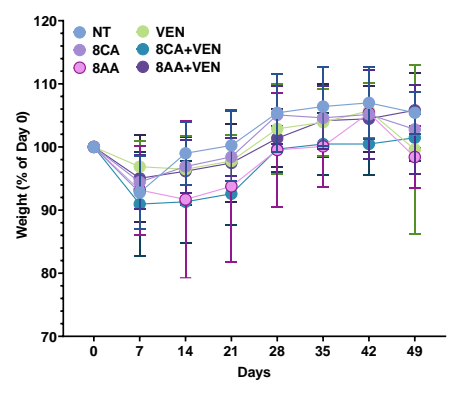

**D**

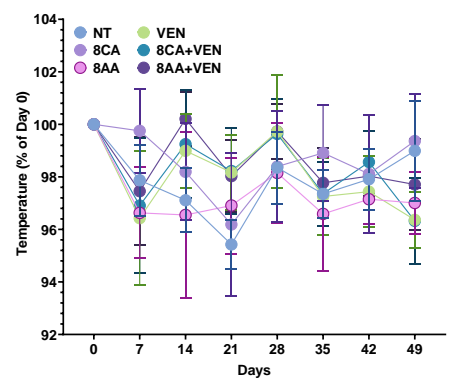

**E**

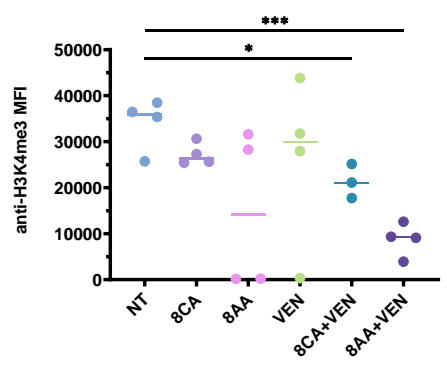



**Supplementary Figure 10. 8CA/8AA and VEN synergistically target R/R AML blasts. A-B** AML blasts were pretreated with vehicle (NT), 1  $\mu$ M 8CA/8AA, 0.02  $\mu$ M VEN or their combinations for 24h, and then cultured in 3D media at the same density to form colonies. The colonies were counted using microscopy and quantified (n=3). **C-D** The body weight and temperature of mice receiving different treatments were monitored. **E** Histone methylations (represented by MFI of anti-H3K4me3) in the mononuclear spleen cells isolated from each group after sacrifice were measured (n $\geq$ 3). <sup>ns</sup>p > 0.05, \*p $\leq$ 0.05, \*\*p $\leq$ 0.01, \*\*\*p $\leq$ 0.001, \*\*\*\*p $\leq$ 0.0001.

## **Supplementary Methods**

### **RNA-Seq**

RNA-Seq reads were trimmed to remove sequencing adapters using Trimmomatic<sup>29</sup> and polyA tails using FASTP<sup>30</sup>. The processed reads were mapped back to the human genome (hg19) using STAR software (v. 2.6.0.a)<sup>31</sup>. The HTSeq software (v.0.11.1) was applied to generate the count matrix, with default parameters<sup>32</sup>.

Differential expression analysis was conducted by adjusting read counts to normalized expression values using TMM normalization method in R<sup>33</sup>.

Pathway analysis was conducted using GSEAP reranked algorithm implemented in GSEA Desktop program in Java, where a ranked list of full genes according to their log<sub>2</sub> fold change and p-values was provided<sup>29, 32</sup>. The top 10 downregulated/upregulated pathways were analyzed through jVeen platform<sup>34</sup>.

### **Ribosomal Profiling**

We followed the protocol as previously reported<sup>35</sup>. Briefly, the cells were lysed, and centrifuged at 16,000g for 15 min to collect the clear supernatant. The lysate was then added on top of a 5%-to-50% sucrose gradient, which was prepared using a Gradient Maker (BioComp). Subsequently, the samples were centrifuged at 28,000 rpm for 3 h at 4°C using an Optima L-100 XP Ultracentrifuge to separate the components of the lysate based on their density. Then the sample was fractionated into 20 fractions and analyzed using a Gradient Station (BioComp) combined with an ECONO UV monitor (Bio-Rad) and a Gilson FC203B fraction collector (Mandel Scientific). RNA was purified from all fractions obtained from the sucrose gradient separation. Purified RNA samples with sufficient concentration were subjected to RT-qPCR analysis to measure METTL16 expression.

### **Cell free methylation system**

Briefly, recombinant human METTL16 protein (Active Motif), SAM (Sigma-Aldrich), and RNA oligo (5'-UGUUGGCGUAGGCUACAGAGAAGCCUUCA-3', IDT) were incubated with 8CA/8AA or their metabolites 8-amino-ATP or 8-chloro-ATP at 37°C for 3-4 h. Subsequently, the RNA was purified and digested using nuclease P1 (Sigma) followed by dephosphorylation using FastAP Alkaline Phosphatase (Fisher Scientific). The samples were then denatured at 65°C for 10 minutes, and the supernatant was collected by centrifugation and analyzed by triple-quadrupole tandem mass spectrometry.

### **Isothermal dose-response fingerprint (ITDRF) analysis**

ITDRF was performed to investigate the direct binding between 8CA/8AA and METTL16 protein<sup>39</sup>. In detail, AML cell lysis (Input) was incubated with 0 uM, 1 uM, 10 uM and 100 uM of 8CA/8AA for 1 h at room temperature. Then the system was heat shocked at 55°C for 3 min, immediately cooled at room temperature, and centrifuged at 20000g for 20 min at 4°C to collect the supernatant. XT sample buffer (Bio-Rad) were added and then the samples were heated to 100°C for 10 min for further blotting analysis.

### **Mass spectrometry**

For quantitative analysis, calibration curves were prepared by spiking methionine, homocysteine (hCys), SAH and SAM (Sigma, St. Louis, MO) over a concentration range of 0 to 10 µM in water. The calibration curve standards, mouse plasma, and cell pellets were subjected to metabolite extraction using 100 µL of water: 300 µL of solvent mixture (methanol: acetonitrile, 3:1, v/v) spiked with 500 nM d3-methionine, d4-SAH, d3-SAM isotopically labelled internal standards (Toronto Research Chemicals, Toronto, ON). For plasma, 20 to 30 µL were diluted with water to a total volume of 100 µL, whereas cells were directly suspended into 100 µL of water for metabolite extraction. The cell pellets were vortexed for 5 s followed by four 30 sec freeze-thaw cycles for

cell lysis. All the samples were vortexed for 5 s and incubated at -20°C for 10 min for protein precipitation. Samples were then centrifuged at 15,000 rpm for 15 min at 4°C. The supernatants were directly analyzed using multiple reaction monitoring (MRM) on a Waters TQD mass spectrometer using a H-Class UHPLC system (Waters Corporation, Milford, MA) using Acquity UPLC BEH-amide column (1.7  $\mu$ M, 2.1X100 mm, Waters). The separation was performed using solvent A (95% Acetonitrile with 10 mM ammonium acetate and 0.1% acetic acid) and solvent B (5% acetonitrile with 10 mM ammonium acetate and 0.1% acetic acid) with a gradient decreasing from 99% to 35% A in 4 min, 95% A for 2.5 min followed by 99% A for 2.5 min. The following MRM transitions were surveyed: methionine ( $m/z$  150.0 <  $m/z$  104.0), hCys ( $m/z$  136.0 <  $m/z$  90.0), SAH ( $m/z$  385.2 <  $m/z$  136.4), SAM ( $m/z$  399.2 <  $m/z$  250.0), d<sub>3</sub>-methionine ( $m/z$  153.0 <  $m/z$  107.0), d<sub>4</sub>-SAH ( $m/z$  389.2 <  $m/z$  136.4), d<sub>3</sub>-SAM ( $m/z$  402.2 <  $m/z$  250.0). For hCys, d<sub>3</sub>-methionine was used as a surrogate internal standard for quantitation. All the analytes exhibited excellent linearity with a coefficient of determination ( $R^2$ )  $\geq$  0.98.

### **Lentiviral transduction and stable cell line**

For lentiviral generation, the envelope plasmid pMD2.G and the packaging plasmid psPAX2 were obtained from Addgene (12259 and 12260, provided by Dr. Didier Trono). MAT2A expressing plasmid pCW57.1-MAT2A was provided by Dr. David Sabatini (Addgene 100521)<sup>33</sup>. 293T producer cells were transfected with plasmids pMD2.G, psPAX2 and pCW57.1-MAT2A by DNA transfection reagent (Lipofectamine LTX; Invitrogen). The supernatant containing lentiviral particles was collected 48 h after transfection. MV4-11 cells were transduced with lentiviral particles and treated with Blasticidin for selection 48h post transduction. After Blasticidin selection for 72h, cells were seeded in 96-well plates at a density of 100 cells or 30 cells/well for single clone selection. Single clones were picked for cell expansion. A stable cell line that constitutively expressed MTA2A (MV4-11-OE) was established, and overexpression of MAT2A was confirmed by Western blot.

## **mRNA dot blotting**

RNA was extracted from cells using RNeasy kit (Qiagen), then enriched for mRNA using Dynabeads Oligo (dT)<sub>25</sub> (ThermoFisher Scientific) and spotted onto Hybond nylon membranes using dot blot apparatus (Bio-Rad) and crosslinked under UV light.
